# Supplementary figures and images for: Hybrid Rocket Engine Burnback Simulations Using Implicit Geometry Descriptions
Source: MDPI journal article supplement (doi:10.3390/aerospace11020103), 2024-01-23

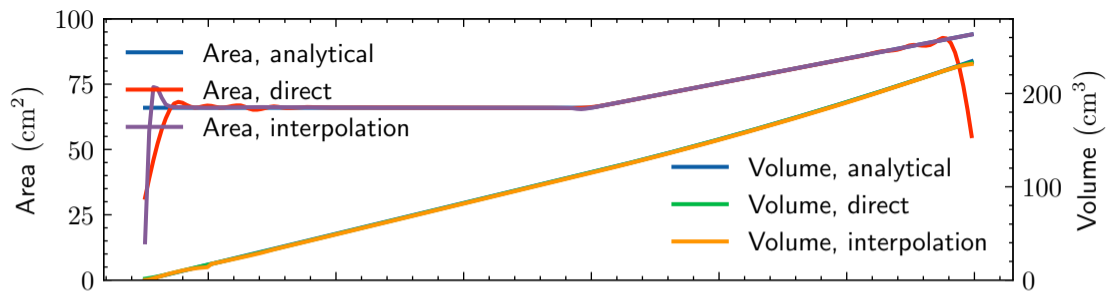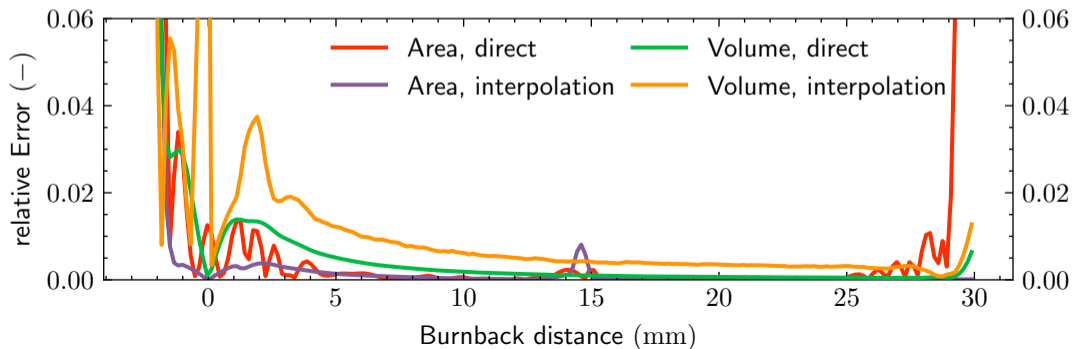

Supplement: s1 [file s1]

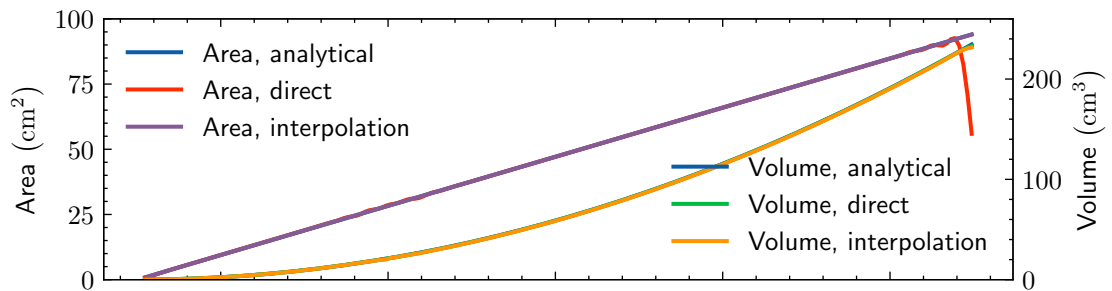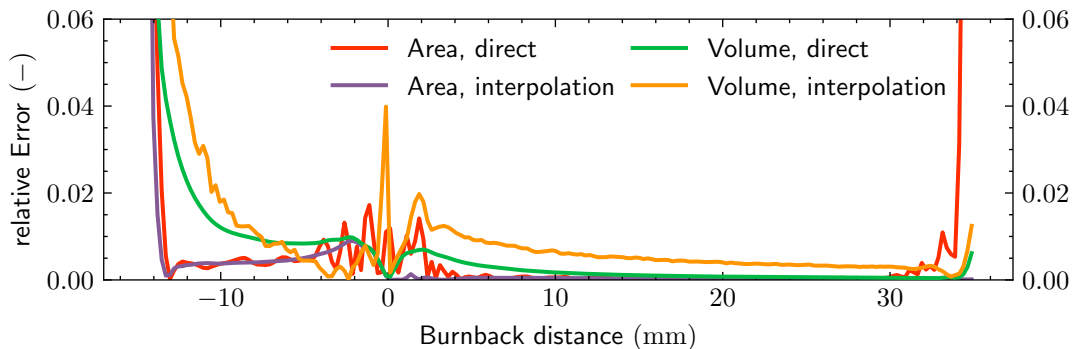

Supplement: s1 [file s1]
